# Supplementary material
Source: publisher site journal article supplement (https://www.dovepress.com/article/270025)
Supplement: Supplementary file 1 [file get_supplementary_file.php]

## D1 antagonist

Crystal structure of human D1 was downloaded from PDB (PDB id: 4IAR, 2.7 Å resolutions). 7.5 Å area around bound ligand ergotamine (anti-migraine drug) was selected. Self-docking revealed rmsd of 1.4 Å. HYDE analyses also showed good affinity

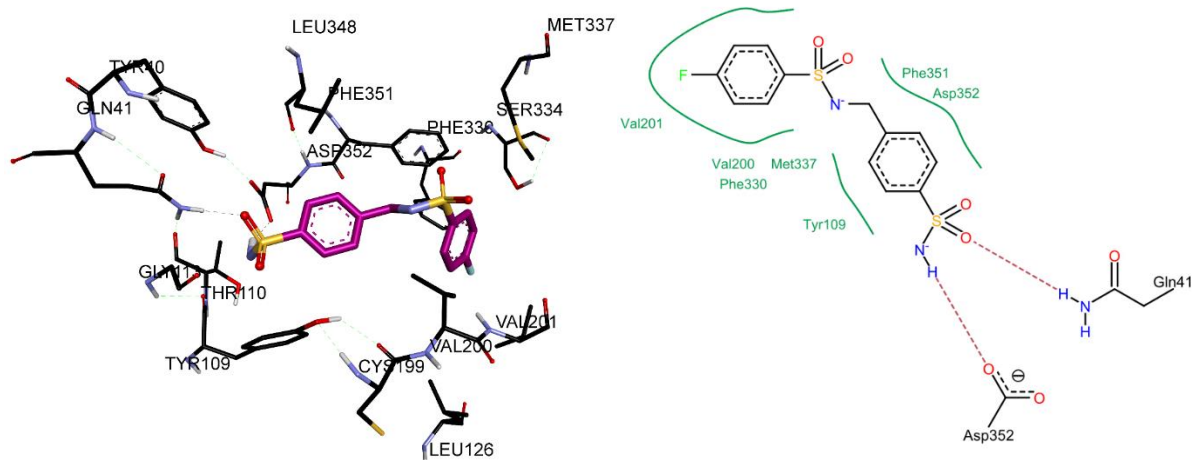

**Figure S1.** Docked conformation of 4-FBS against D1 receptor

Figure S1 shows docked conformation of compound 4-FBS against D1 receptor. All compounds were found to bind in the same region as that of co-crystallized ligand, ergotamine. The terminal sulfonamide group was found to make hydrogen bonds with Asp353 and Gln41 via sulfonamide nitrogen and oxygen atoms respectively.

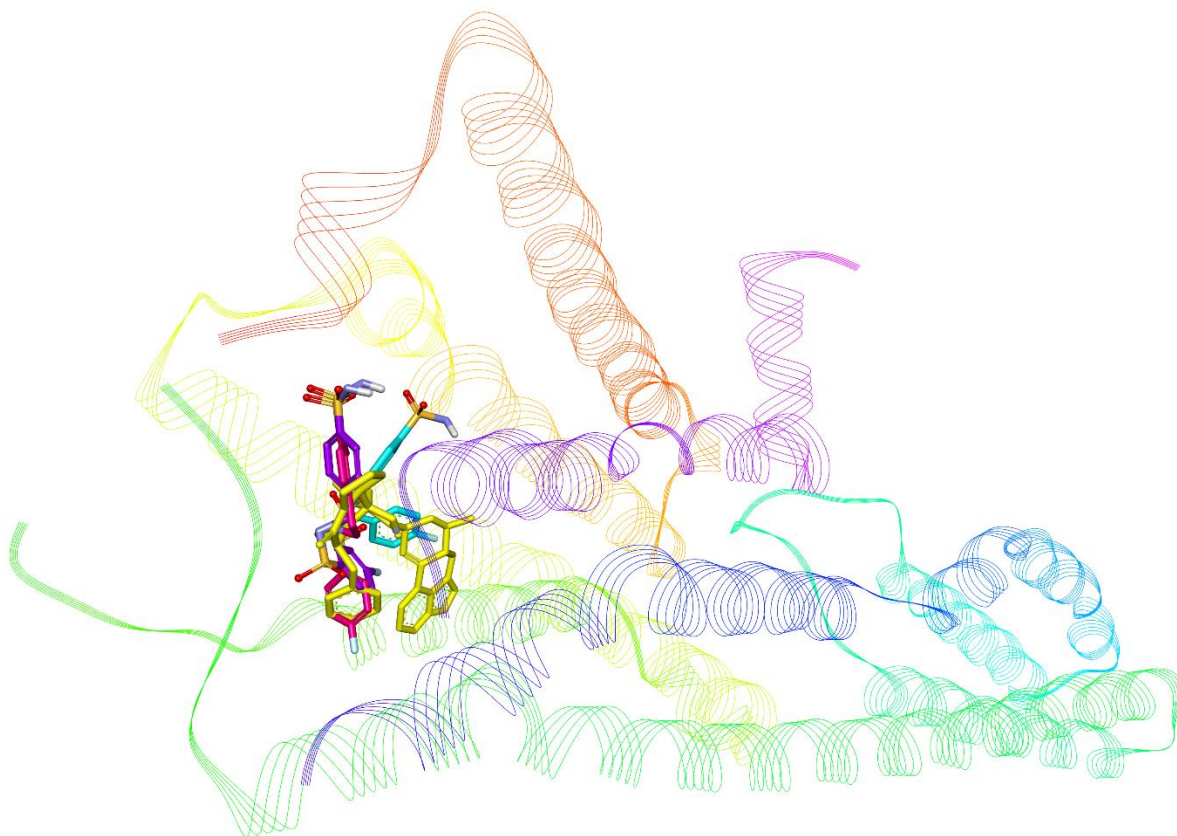

**Figure S2.** Overlap of docked conformations of 4-FBS with co-crystallized anti-migraine drug ergotamine (yellow).

**Table S1.** Predicted binding free energy ( $\Delta G$ , kJ/mol) for all docked compounds 4-FBS

| Compound | Binding Energy (kJ/mol) |
|----------|-------------------------|
| 4-FBS    | -16                     |
